# Supplementary material for: Identifying drivers of health care value: a scoping review of the literature
Source: Springer Nature journal article supplement (doi:10.1186/s12913-022-08225-6), 2022-06-30
Supplement: MOESM1 [file 23224182]

## Appendix 1. Search Strategy

|                       | Search                                                          | Filter  | Date    | Hits    | Exported       |
|-----------------------|-----------------------------------------------------------------|---------|---------|---------|----------------|
| <b>Scopus</b>         |                                                                 |         |         |         |                |
|                       | TITLE ( value AND (healthcare OR "health care"))                | English | 2.10.20 | 1,710   | 20 (Top Cited) |
| <b>PubMed</b>         |                                                                 |         |         |         |                |
|                       | low value care[Titl]                                            | English | 2.11.20 | 85      | 85             |
|                       | ("value"[Titl]) AND ("health care"[Titl] OR "healthcare"[Titl]) | English | 2.28.20 | 1,064   | 1,064          |
|                       | high value care[Titl]                                           | English | 3.12.20 | 122     | 122            |
| <b>Embase</b>         |                                                                 |         |         |         |                |
| 1                     | Value.m_titl.                                                   |         | 3.23.20 | 128,288 |                |
| 2                     | Healthcare.m_titl.                                              |         | 3.23.20 | 56,234  |                |
| 3                     | Health care.m_title.                                            |         | 3.23.20 | 100,869 |                |
| 4                     | 2 or 3                                                          |         | 3.23.20 | 156,821 |                |
| 5                     | 1 and 4                                                         |         | 3.23.20 | 1,296   |                |
| 6                     | Limit 5 to English                                              | English | 3.23.20 | 1,241   | 1,241          |
| 7                     | High value care.m_titl.                                         | English | 3.23.20 | 160     | 160            |
| 8                     | Low value care.m_title.                                         | English | 3.23.20 | 95      | 95             |
| <b>Policy File</b>    |                                                                 |         |         |         |                |
|                       | ti(value) AND (ti(health care) OR ti(health care))              | English | 3.25.20 | 47      | 47             |
|                       | ti(high value care)                                             | English | 3.25.20 | 4       | 4              |
|                       | ti(low value care)                                              | English | 3.25.20 | 0       | 0              |
| <b>Google Scholar</b> |                                                                 |         |         |         |                |
|                       | allintitle: value "health care" OR healthcare                   | English | 3.25.20 | 3,960   | 100            |
|                       | allintitle: high value care                                     | English | 3.25.20 | 531     | 100            |
|                       | allintitle: low value care                                      | English | 3.25.20 | 306     | 100            |

## Appendix 2. Full Set of Inclusion and Exclusion Criteria

| Inclusion                                                  | Exclusion                                                                |
|------------------------------------------------------------|--------------------------------------------------------------------------|
| Original research looking at factors associated with value | Abstracts                                                                |
| English language                                           | Articles introducing a journal issue                                     |
|                                                            | Replies                                                                  |
|                                                            | Protocols                                                                |
|                                                            | Focused on implementation of practices or interventions to improve value |
|                                                            | Opinion-based article                                                    |
|                                                            | Articles focused on a specific service or specialty                      |
|                                                            | Literature Review                                                        |
