# Supplementary material for: Identifying drivers of health care value: a scoping review of the literature
Source: Springer Nature journal article supplement (doi:10.1186/s12913-022-08225-6), 2022-06-30
Supplement: MOESM2 [file 23224182]

|                      | Did the study address a clearly focused issue? | Was the cohort recruited in an acceptable way? | Was the exposure accurately measured? | Was the outcome accurately measured? | Have the authors identified all important confounding factors? | Have they taken account of the confounding factors in the design and/or analysis? | Was the follow-up. Of subjects complete? | Was the follow-up of subjects long enough? | How precise are the results? | Do you believe the results? | Can the results be applied to the local US population?* | Do the results of this study fit with other available evidence? | What are the implications of this study for practice? |
|----------------------|------------------------------------------------|------------------------------------------------|---------------------------------------|--------------------------------------|----------------------------------------------------------------|-----------------------------------------------------------------------------------|------------------------------------------|--------------------------------------------|------------------------------|-----------------------------|---------------------------------------------------------|-----------------------------------------------------------------|-------------------------------------------------------|
| Badgery-Parker, 2019 | Green                                          | Green                                          | Green                                 | Green                                | Yellow                                                         | Green                                                                             | Green                                    | Green                                      | Green                        | Green                       | Based in NSW                                            | Yellow                                                          | Green                                                 |
| Barnett, 2017        | Green                                          | Green                                          | Green                                 | Green                                | Yellow                                                         | Green                                                                             | Green                                    | Green                                      | Green                        | Green                       | Based in US                                             | Green                                                           | Green                                                 |
| Barreto, 2019        | Green                                          | Green                                          | Green                                 | Green                                | Yellow                                                         | Green                                                                             | Green                                    | Green                                      | Green                        | Green                       | Based in US                                             | Green                                                           | Green                                                 |
| Bouck, 2018          | Green                                          | Green                                          | Green                                 | Green                                | Yellow                                                         | Green                                                                             | Green                                    | Green                                      | Green                        | Green                       | Based in Ontario                                        | Green                                                           | Green                                                 |
| Braithwaite, 2010    | Green                                          | Green                                          | Green                                 | Green                                | Yellow                                                         | Green                                                                             | Green                                    | Green                                      | Red                          | Green                       | Based in US                                             | Yellow                                                          | Green                                                 |
| Charlesworth, 2016   | Green                                          | Green                                          | Green                                 | Green                                | Yellow                                                         | Green                                                                             | Green                                    | Green                                      | Yellow                       | Green                       | Based in Oregon                                         | Green                                                           | Green                                                 |
| Colla, 2014          | Green                                          | Green                                          | Green                                 | Green                                | Yellow                                                         | Green                                                                             | Green                                    | Green                                      | Green                        | Green                       | Based in US                                             | Green                                                           | Green                                                 |
| Colla, 2018          | Green                                          | Green                                          | Green                                 | Green                                | Yellow                                                         | Green                                                                             | Green                                    | Green                                      | Green                        | Green                       | Based in US                                             | Green                                                           | Green                                                 |
| Cronberg, 2015       | Green                                          | Green                                          | Green                                 | Yellow                               | Yellow                                                         | Green                                                                             | Green                                    | Yellow                                     | Red                          | Green                       | Based in England                                        | Yellow                                                          | Green                                                 |
| Koehlmoos, 2019      | Green                                          | Green                                          | Green                                 | Green                                | Red                                                            | Red                                                                               | Green                                    | Green                                      | Red                          | Red                         | Based in US                                             | Yellow                                                          | Red                                                   |
| Mafi, 2016           | Green                                          | Green                                          | Green                                 | Green                                | Yellow                                                         | Green                                                                             | Green                                    | Green                                      | Green                        | Green                       | Based in US                                             | Green                                                           | Green                                                 |
| Mafi, 2017           | Green                                          | Green                                          | Green                                 | Green                                | Yellow                                                         | Green                                                                             | Green                                    | Green                                      | Green                        | Green                       | Based in US                                             | Green                                                           | Green                                                 |
| McAlister, 2017      | Green                                          | Green                                          | Green                                 | Green                                | Yellow                                                         | Green                                                                             | Green                                    | Green                                      | Green                        | Green                       | Based in Alberta                                        | Green                                                           | Green                                                 |
| Gronce, 2019         | Green                                          | Green                                          | Green                                 | Green                                | Yellow                                                         | Green                                                                             | Green                                    | Green                                      | Yellow                       | Green                       | Based in US                                             | Green                                                           | Green                                                 |
| Pendrith, 2017       | Green                                          | Green                                          | Green                                 | Green                                | Yellow                                                         | Red                                                                               | Green                                    | Green                                      | Red                          | Red                         | Based in Ontario                                        | Yellow                                                          | Green                                                 |
| Reid, 2016           | Green                                          | Green                                          | Yellow                                | Green                                | Yellow                                                         | Green                                                                             | Green                                    | Green                                      | Yellow                       | Green                       | Based in US                                             | Yellow                                                          | Green                                                 |
| Reid, 2017           | Green                                          | Green                                          | Green                                 | Green                                | Yellow                                                         | Green                                                                             | Green                                    | Green                                      | Yellow                       | Green                       | Based in US                                             | Green                                                           | Green                                                 |
| Schpero, 2017        | Green                                          | Green                                          | Green                                 | Green                                | Yellow                                                         | Green                                                                             | Green                                    | Green                                      | Green                        | Green                       | Based in US                                             | Yellow                                                          | Green                                                 |
| Schwartz, 2015       | Green                                          | Green                                          | Green                                 | Green                                | Yellow                                                         | Green                                                                             | Green                                    | Green                                      | Yellow                       | Green                       | Based in US                                             | Green                                                           | Green                                                 |
| Schwartz, 2018       | Green                                          | Green                                          | Green                                 | Green                                | Yellow                                                         | Green                                                                             | Green                                    | Green                                      | Green                        | Green                       | Based in US                                             | Green                                                           | Green                                                 |
| Schwartz, 2019       | Green                                          | Green                                          | Green                                 | Green                                | Yellow                                                         | Green                                                                             | Green                                    | Green                                      | Green                        | Green                       | Based in US                                             | Green                                                           | Green                                                 |
| Weeks, 2016          | Green                                          | Green                                          | Green                                 | Green                                | Yellow                                                         | Green                                                                             | Green                                    | Green                                      | Red                          | Yellow                      | Based in US                                             | Yellow                                                          | Green                                                 |

\*Note: Setting was considered when addressing generalizability in data synthesis

| KEY                  |
|----------------------|
| Yes/Completely       |
| Mostly               |
| Partially/Can't Tell |
| No/Not at All        |
